# Supplementary material
Source: PubMed Central journal article supplement (PMC4048768)
Supplement: NIHMS562114-supplement-01.pdf [file NIHMS562114-supplement-01.pdf]

**Supplemental Table 1.** Primers used for q-RT-PCR analysis. Nucleotide sequences of right and left primers are shown. The sizes of the Amplicon and Roche UPL probes are noted.

| <b>Gene</b>                                                     | <b>Right Primer</b>  | <b>Left Primer</b>     | <b>Amplicon</b> | <b>UPL Probe #</b> |
|-----------------------------------------------------------------|----------------------|------------------------|-----------------|--------------------|
| <i>glutathione peroxidase 7</i><br><i>gpx7</i>                  | ttccatctggggctactagg | ccatcctgcctcaagtacc    | 86 nt           | 12                 |
| <i>glutathione synthetase</i><br><i>gss</i>                     | tcacctgttgatggtgct   | cctgctagtggatgctgtca   | 75 nt           | 1                  |
| <i>glutathione S-transferase mu 2</i><br><i>gstm2</i>           | ggcagagatcttctccaagc | tgatgtccttgagagaaaccaa | 106 nt          | 27                 |
| <i>glutathione S-transferase theta 2</i><br><i>gstt2</i>        | atcaggatggccgagctt   | gcagcacaagagcaaggagt   | 102 nt          | 64                 |
| <i>superoxide dismutase 2</i><br><i>sod2</i>                    | tgatggcttccagcaactc  | ctggacaaacctcagcccta   | 62 nt           | 22                 |
| <i>thioredoxin reductase 2</i><br><i>txnr2</i>                  | aggttccacgtagtccacca | agcgggactatgatctcctg   | 110 nt          | 33                 |
| <i>glyceraldehyde-3-phosphate dehydrogenase</i><br><i>gapdh</i> | gccaatacgaacaaatcc   | agccacatcgctcagacac    | 66 nt           | 60                 |

**Supplemental Table 2.** Paraoxon does not induce peroxide production in HSG cells. Samples were analyzed in triplicate (n = 3) and results are shown as averages with standard deviation.

|                 | <b>Fluorescence (RFU)</b> | <b>Standard Deviation</b> |
|-----------------|---------------------------|---------------------------|
| <i>Control</i>  | 167.56                    | 58.19                     |
| <i>Paraoxon</i> | 171.08                    | 60.07                     |

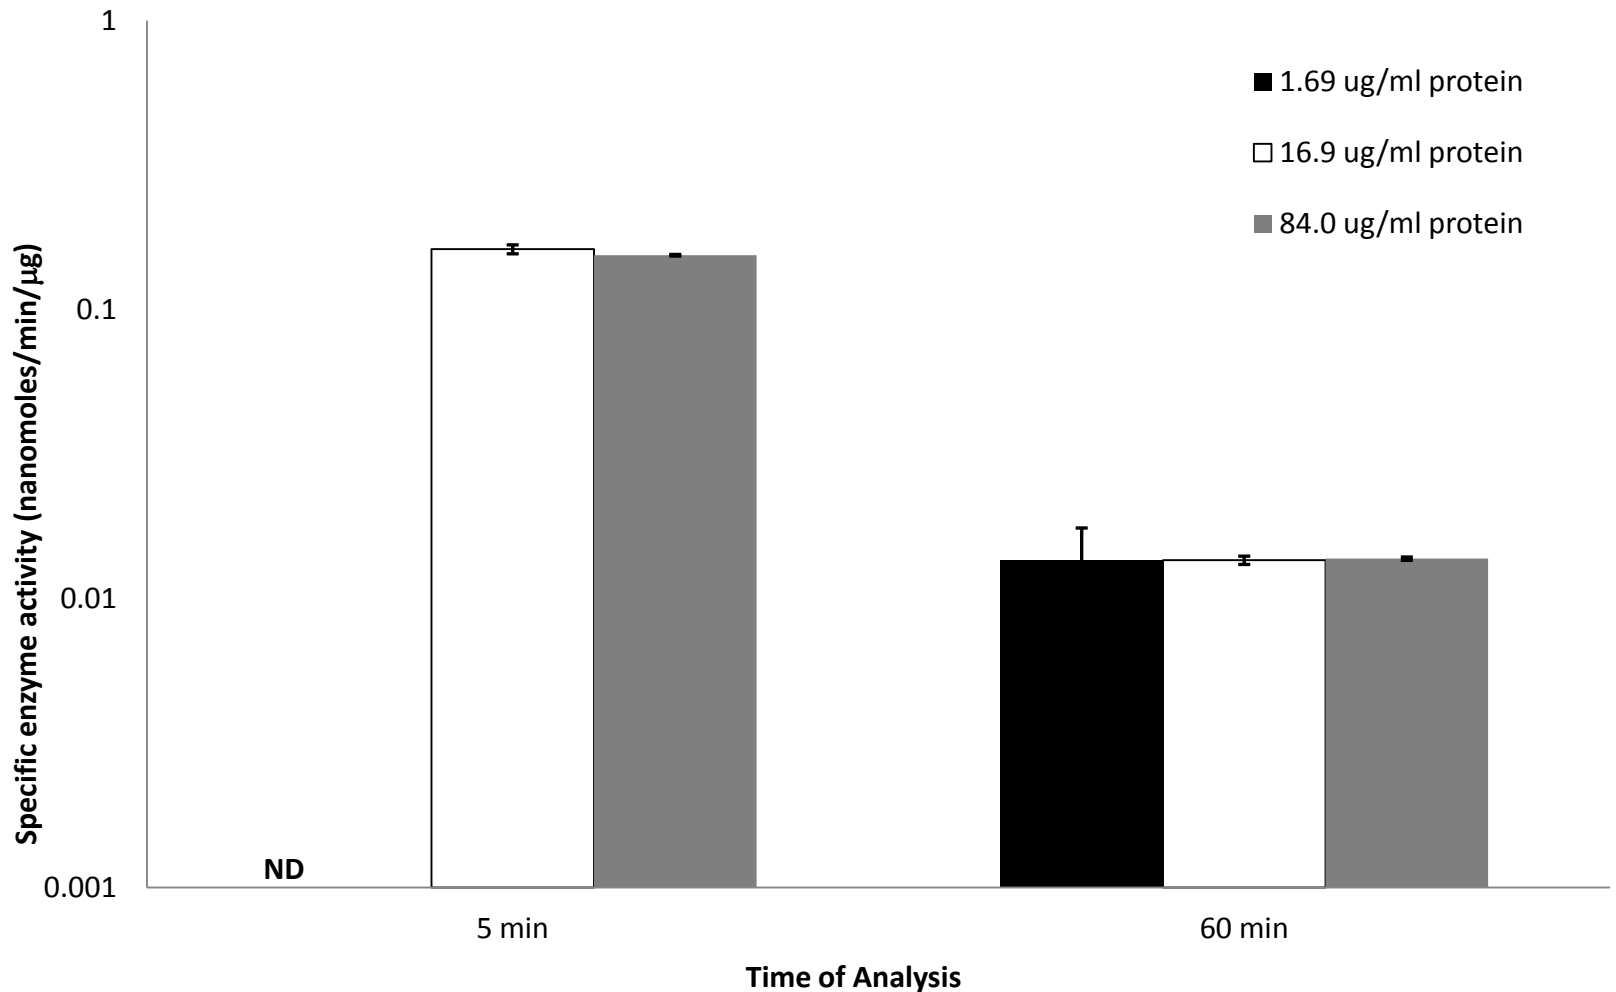

**Supplemental Fig. 1.** HSG cells express very low amounts of AChE activity. Ellman assays were performed on crude protein lysates of HSG cells. Various amounts of protein were analyzed at two time points. Black bars, 8.45  $\mu\text{g/ml}$  protein; white bars, 84.5  $\mu\text{g/ml}$  protein; gray bars, 420  $\mu\text{g/ml}$  protein. ACh hydrolysis activity is expressed as nanomoles substrate hydrolyzed/min/ $\mu\text{g}$ . Samples were analyzed in triplicate and the results shown are the average activity with standard deviation; ND: not detectable.
